# Supplementary material for: CBP-Mediated Acetylation of Importin α Mediates Calcium-Dependent Nucleocytoplasmic Transport of Selective Proteins in Drosophila Neurons
Source: PubMed Central journal article supplement — Mol Cells. 2022 Sep 28;45(11):855–67. doi: 10.14348/molcells.2022.0104 (PMC9676984; doi:10.14348/molcells.2022.0104), 2022-09-28
Supplement: molce-45-11-855-supple.pdf [file molce-45-11-855-supple.pdf]

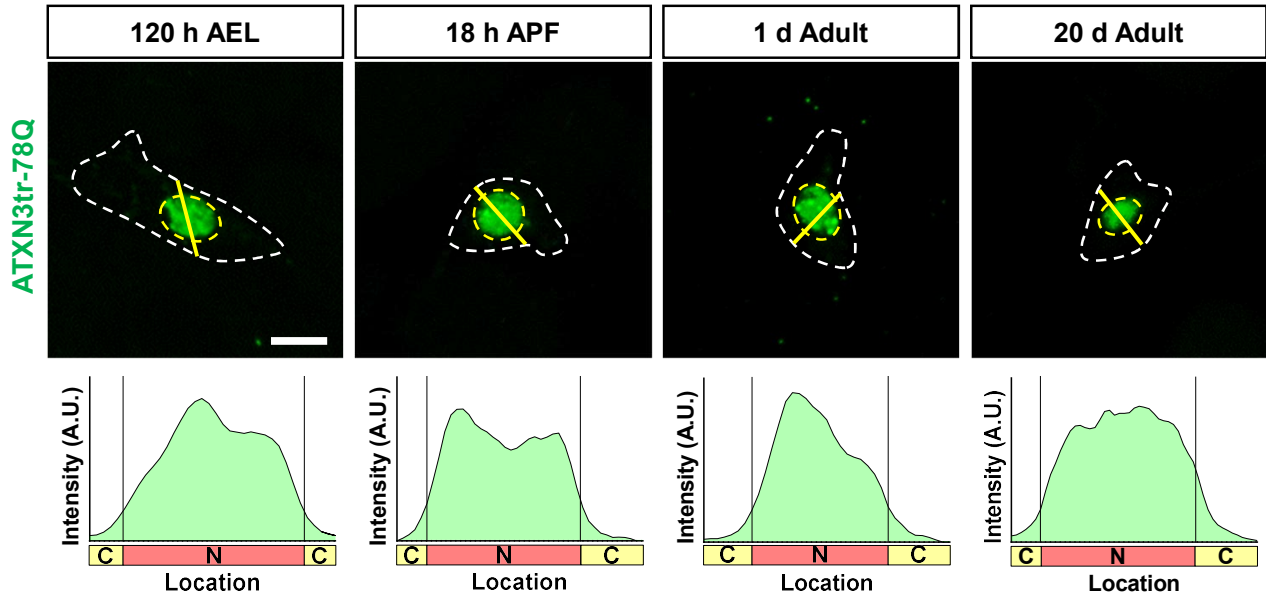

**Supplementary Fig. S1. ATXN3tr-78Q shows a strong tendency to accumulate within the nucleus of *Drosophila* sensory neurons during development.** Subcellular localization of overexpressed HA-ATXN3tr-78Q proteins in C4da neurons during development stages (120 h AEL, 18 h APF, 1 d adult, and 20 d adult) [ $+/+; ppk^{1a}-GAL4>UAS-CD4-tdGFP/UAS-HA-ATXN3tr-78Q$ ]. Outer and inner dashed lines indicate the borders of cell bodies and nuclei, respectively. Scale bar = 5  $\mu$ m. The intensity profile of fluorescent signals representing ATXN3tr-78Q proteins across cell bodies along yellow lines are presented at the bottom.

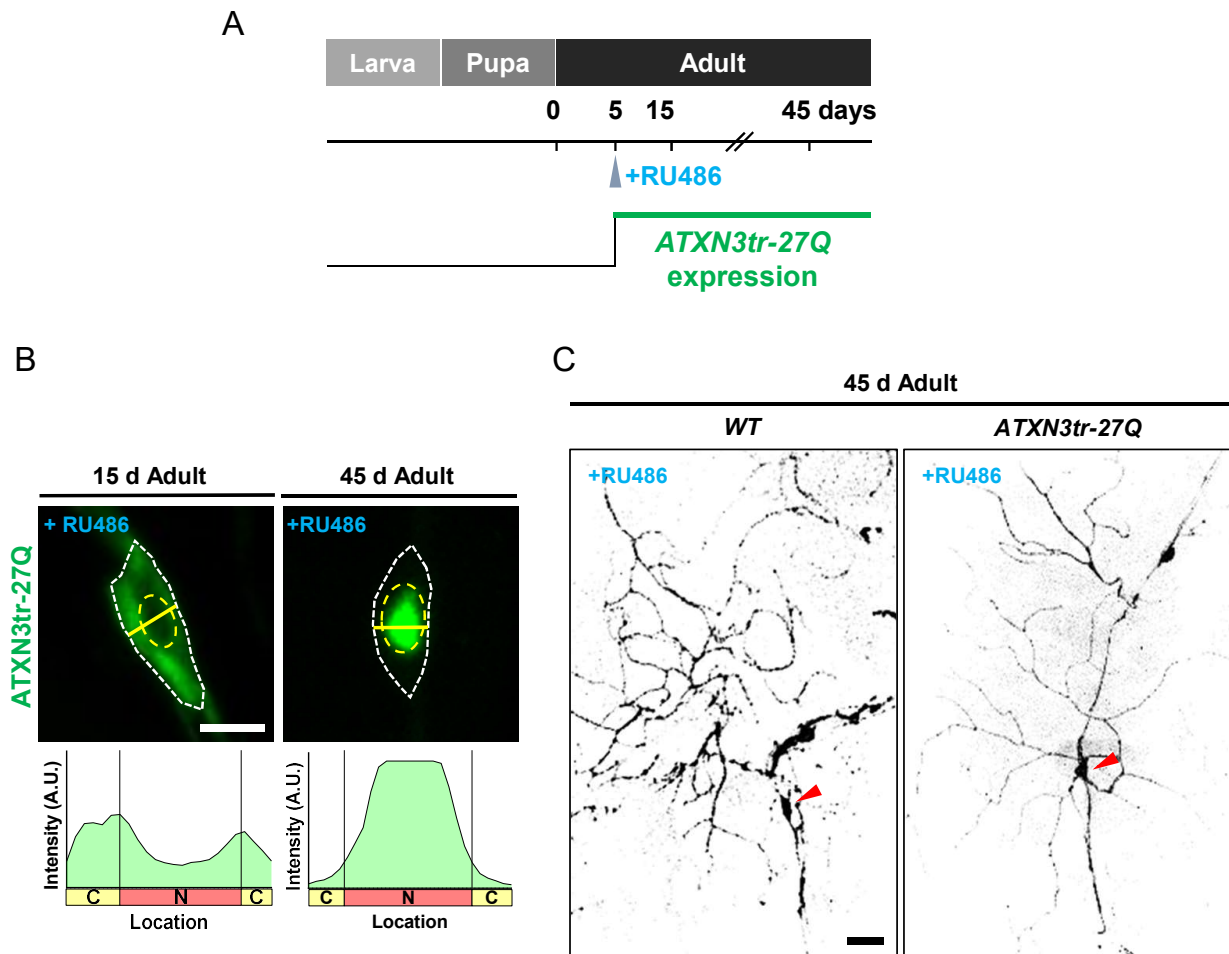

**Supplementary Fig. S2. Adult-specific expression of ATXN3tr-27Q leads to aging-dependent nuclear accumulation in neurons accompanied by dendrite defects.** (A) Experimental scheme for adult-specific expression of HA-ATXN3tr-27Q in C4da neurons. To activate gene switch-mediated transcription of GAL4 (*GS-ppk<sup>1a</sup>-GAL4*), adult flies were fed food with RU486 from 5 days. (B) Subcellular localization of overexpressed HA-ATXN3tr-27Q proteins in C4da neurons at 15 days adult and 45 days adult [*+/+;GS-ppk<sup>1a</sup>-GAL4>ppk-CD4-tdtom/UAS-HA-ATXN3tr-27Q*]. Outer and inner dashed lines indicate the borders of cell bodies and nuclei, respectively. Scale bar = 5  $\mu$ m. The intensity profile of fluorescent signals representing ATXN3tr-27Q proteins across cell bodies along yellow lines are presented at the bottom. (C) Representative images of dendrites of C4da neurons of WT or expressing HA-ATXN3tr-27Q [*WT, +/+;GS-ppk<sup>1a</sup>-GAL4>ppk-CD4-tdtom/+*, *ATXN3tr-27Q, +/+;GS-ppk<sup>1a</sup>-GAL4>ppk-CD4-tdtom/UAS-HA-ATXN3tr-27Q*]. Red-colored arrowheads indicate cell bodies of C4da neurons. Scale bar = 100  $\mu$ m.

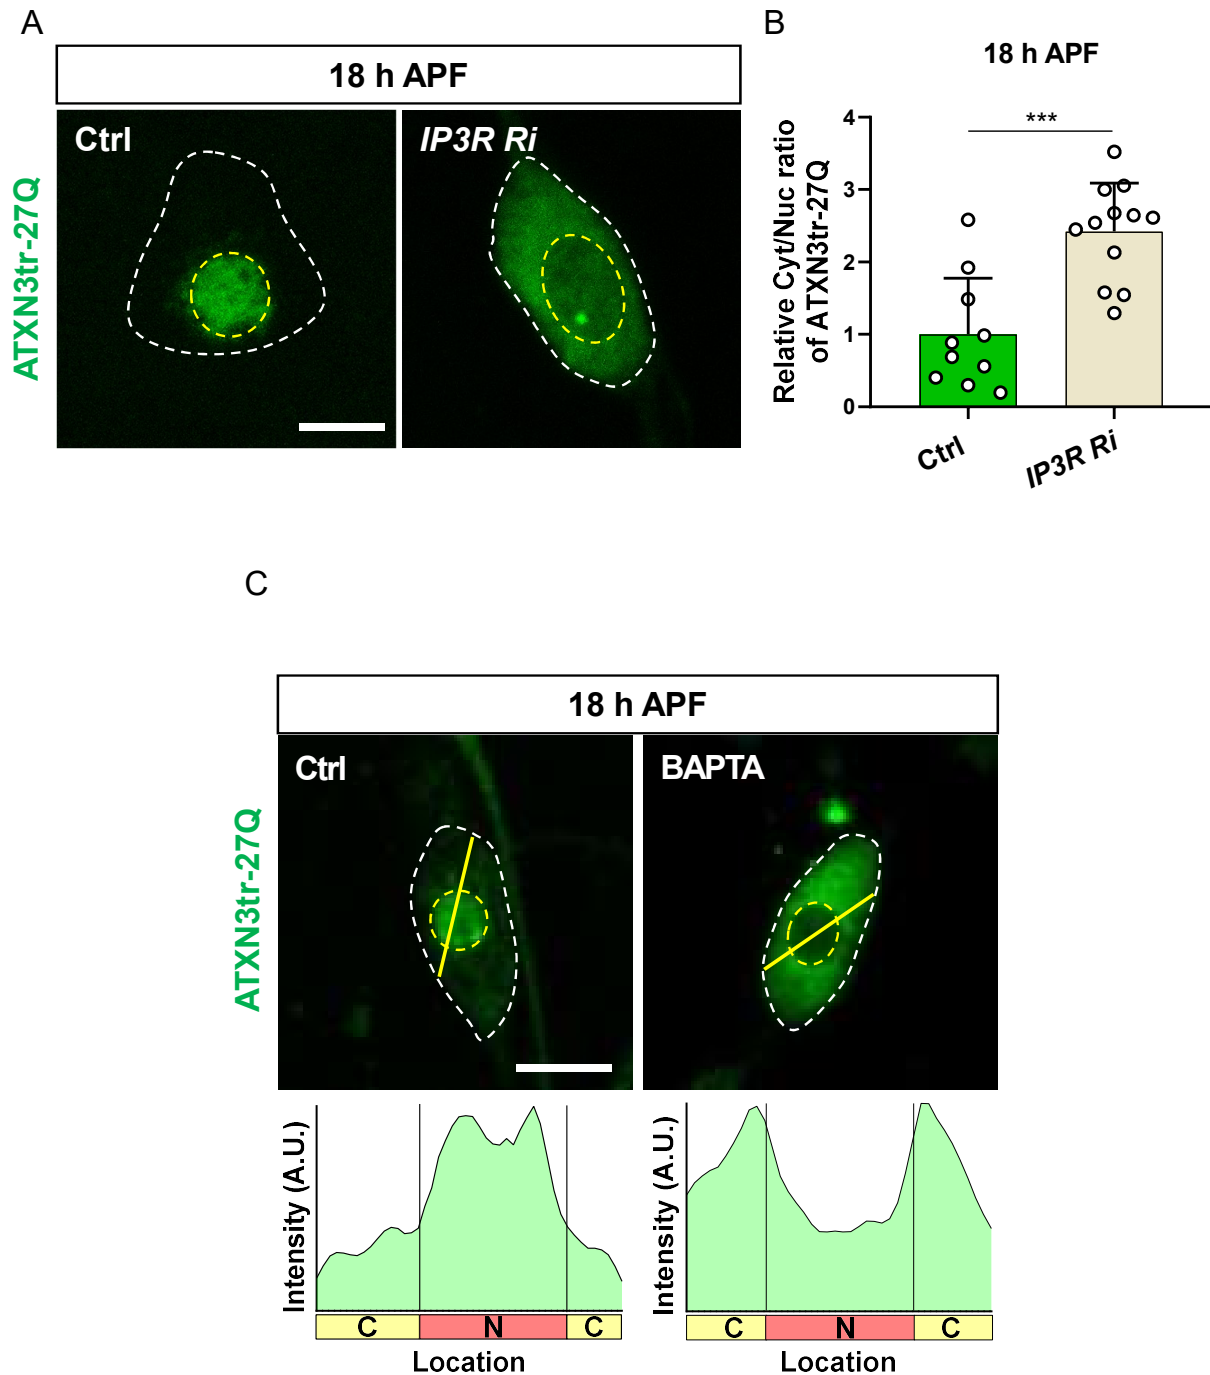

**Supplementary Fig. S3. Genetic and chemical manipulation of intracellular calcium level prevents nuclear accumulation of ATXN3tr-27Q in neurons during pupal stage.** (A) Subcellular localization of overexpressed HA-ATXN3tr-27Q proteins in C4da neurons of Ctrl or expressing *IP3R Ri* at 18 h APF [Ctrl, *+/+;ppk<sup>1a</sup>-GAL4/UAS-HA-ATXN3tr-27Q*, *IP3R Ri*, *UAS-IP3R RNAi/+;ppk<sup>1a</sup>-GAL4/UAS-HA-ATXN3tr-27Q*]. Outer and inner dashed lines indicate the borders of cell bodies and nuclei, respectively. Scale bar = 5  $\mu$ m. (B) Quantification of Cyt/Nuc ratio of HA-ATXN3tr-27Q proteins in C4da neurons of Ctrl or expressing *IP3R Ri* 18 h APF. Values are presented as mean  $\pm$  SD. \*\*\* $P$  = 0.0002 by two-tailed  $t$ -test;  $n$  = 10 for Ctrl,  $n$  = 12 for *IP3R Ri*. (C) Subcellular localization of overexpressed HA-ATXN3tr-27Q proteins in C4da neurons of ctrl or feeding with BAPTA at 18 h APF [*+/+;ppk<sup>1a</sup>-GAL4/UAS-HA-ATXN3tr-27Q*]. Outer and inner dashed lines indicate the borders of cell bodies and nuclei, respectively. Scale bar = 5  $\mu$ m. The intensity profile of fluorescent signals representing ATXN3tr-27Q proteins across cell bodies along yellow lines are presented at the bottom.

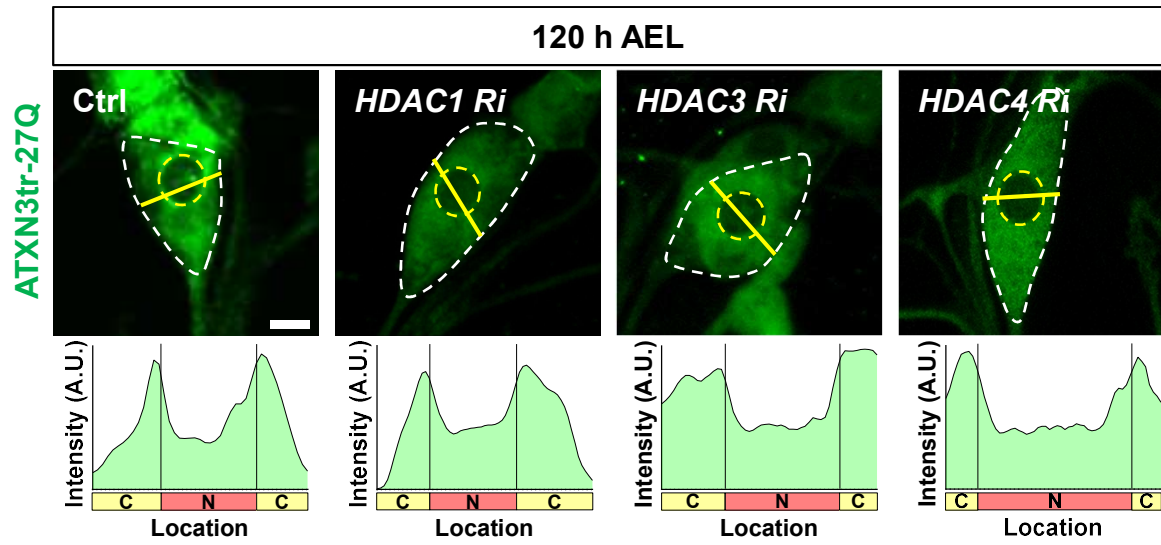

**Supplementary Fig. S4. CBP-associated histone acetylation is not essential for NCT of ATXN3tr-27Q in neurons.** Subcellular localization of overexpressed ATXN3tr-27Q proteins in pan-da neurons of Ctrl or expressing a subset of HDACs *Ri* at 120 h AEL [*Ctrl*, *109(2)80-GAL4/+;UAS-HA-ATXN3tr-27Q/+*, *HDAC1 RNAi*, *109(2)80-GAL4/+;UAS-HA-ATXN3tr-27Q/UAS-HDAC1 RNAi*, *HDAC3 RNAi*, *109(2)80-GAL4/+;UAS-HA-ATXN3tr-27Q/UAS-HDAC3 RNAi*, *HDAC4 RNAi*, *109(2)80-GAL4/+;UAS-HA-ATXN3tr-27Q/UAS-HDAC4 RNAi*]. Outer and inner dashed lines indicate the borders of cell bodies and nuclei, respectively. Scale bar = 5  $\mu$ m. The intensity profile of fluorescent signals representing ATXN3tr-27Q proteins across cell bodies along yellow lines are presented at the bottom.

A

Human: Rch1  
 Drosophila: Imp  $\alpha 3$

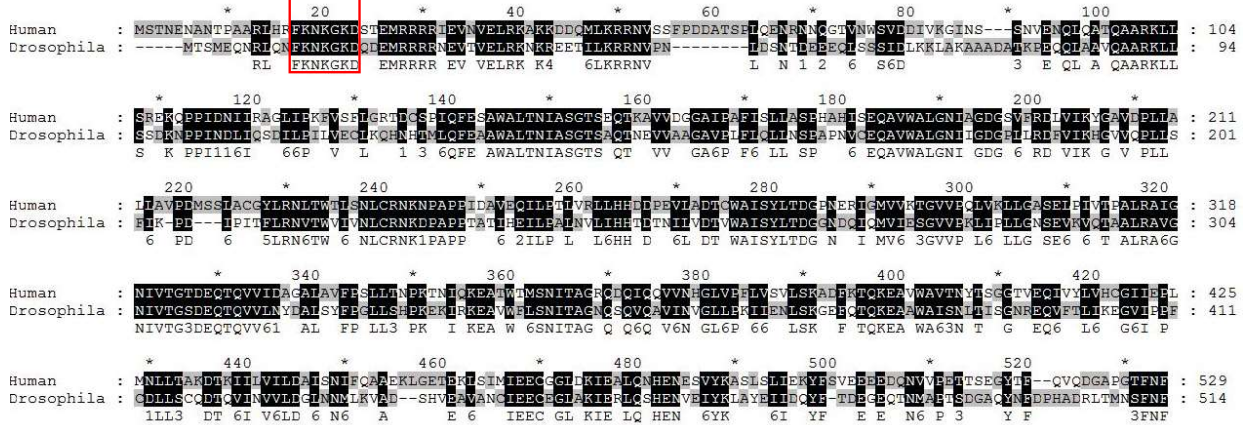

B

**Drosophila Imp  $\alpha 3$**

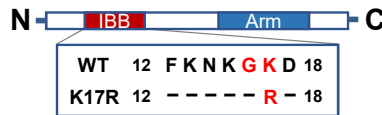

**Supplementary Fig. S5. *Drosophila Imp  $\alpha 3$*  has a consensus sequence conserved from human Rch1 for CBP-dependent acetylation.** (A) Sequences alignment between human Rch1 and *Drosophila Imp  $\alpha 3$*  using GeneDoc. Amino acids on a black background are identical. Those on a gray background are similar for side chain hydrophobicity. Red rectangle indicates “FKNKGD” sequence, acetylation site. (B) Schematic representation of the domain structure of *Drosophila Imp  $\alpha 3$* . The WT protein sequence (amino acids 12-18) and the GK motif, known to be acetylated by CBP (Bannister et al., 2000), is shown in red. The positions and sequence of the point mutation (K17R) introduced into Imp  $\alpha 3$  is shown below the WT protein sequence. A dash indicates no change. IBB, Importin  $\beta$  binding domain; ARM, Armadillo repeats.

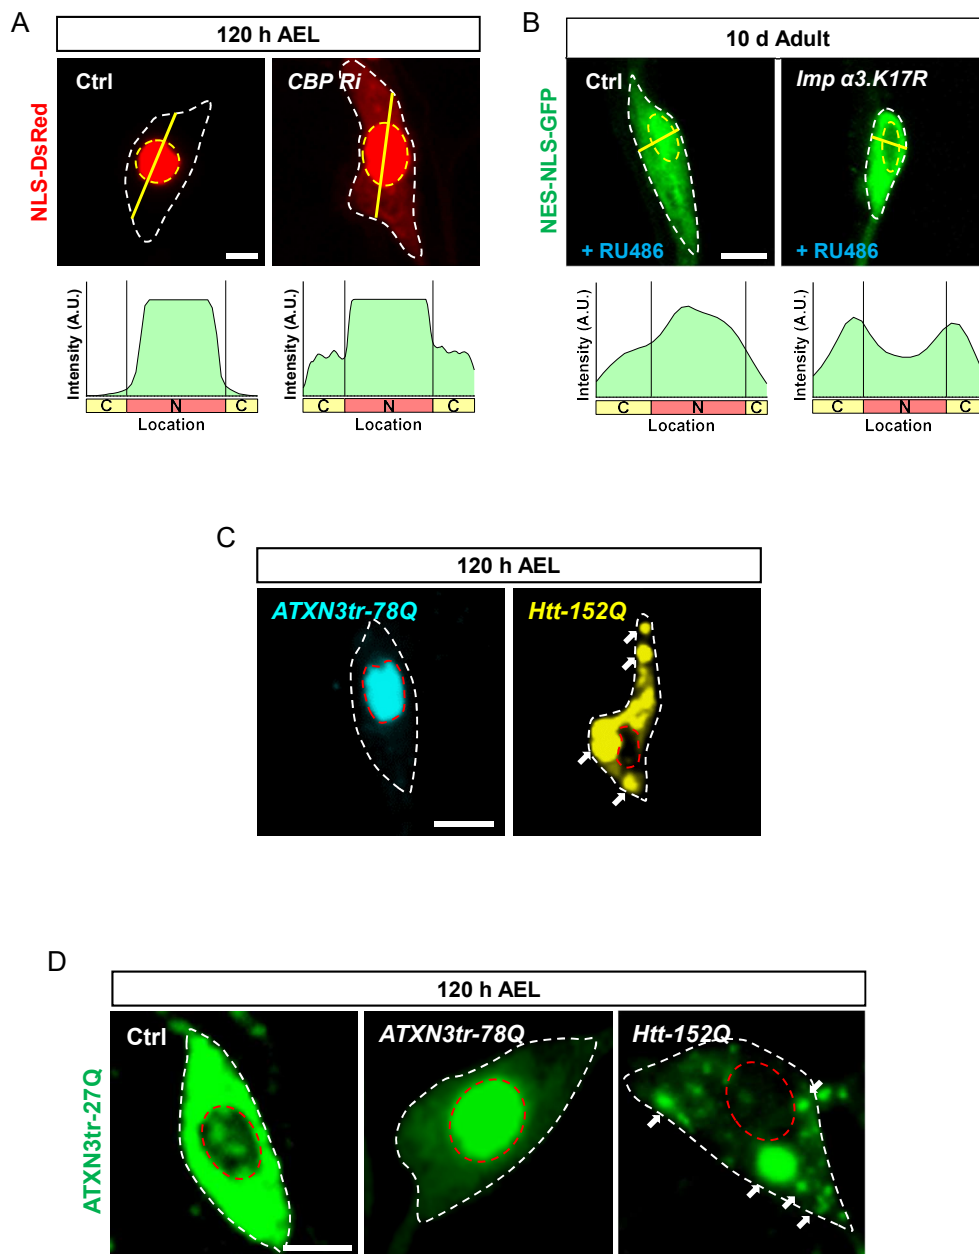

**Supplementary Fig. S6. CBP-mediated acetylation of *Drosophila Imp  $\alpha$ 3* is involved in NCT of additional NLS-containing proteins in neurons.** (A) Subcellular localization of overexpressed NLS-DsRed proteins in C4da neurons at 120 h AEL [Ctrl, *UAS-RedStinger/+;ppk<sup>1a</sup>-GAL4/+*, *CBP<sup>Ri</sup>*, *UAS-RedStinger/UAS-CBP RNAi;ppk<sup>1a</sup>-GAL4/+*]. Outer and inner dashed lines indicate the borders of cell bodies and nuclei, respectively. Scale bar = 5  $\mu$ m. The intensity profile of fluorescent signals representing NLS-DsRed proteins across cell bodies along yellow lines are presented at the bottom. (B) Subcellular localization of overexpressed NES-NLS-GFP proteins in C4da neurons at adult 10 days [Ctrl, *+/+;ppk<sup>1a</sup>-GAL4/UAS-NES-NLS-GFP*, *Imp  $\alpha$ 3.K17R*, *UAS-2xFlag-Imp  $\alpha$ 3.K17R/+;ppk<sup>1a</sup>-GAL4/UAS-NES-NLS-GFP*]. Outer and inner dashed lines indicate the borders of cell bodies and nuclei, respectively. Scale bar = 5  $\mu$ m. The intensity profile of fluorescent signals representing NES-NLS-GFP proteins across cell bodies along yellow lines are presented at the bottom. (C) Subcellular localization of overexpressed HA-ATXN3tr-78Q and Htt-152Q-eGFP proteins in pan-da neurons at 120 h AEL [*ATXN3tr-78Q*, *109(2)80-GAL4/+;UAS-HA-ATXN3tr-78Q/+*, *Htt-152Q*, *109(2)80-GAL4/+;UAS-Htt-152Q-eGFP/+*]. Outer and inner dashed lines indicate the borders of cell bodies and nuclei, respectively. White-colored arrows indicate cytosolic protein aggregates in the cell bodies of C4da neurons. Scale bar = 5  $\mu$ m. (D) Subcellular localization of overexpressed ATXN3tr-27Q proteins in pan-da neurons of Ctrl or expressing *HA-ATXN3tr-78Q* or *Htt-152Q-eGFP* at 120 h AEL [Ctrl, *109(2)80-GAL4/+;UAS-HA-ATXN3tr-27Q/+*, *ATXN3tr-78Q*, *109(2)80-GAL4/+; UAS-HA-ATXN3tr-27Q/UAS-HA-ATXN3tr-78Q*, *Htt-152Q*, *109(2)80-GAL4/+; UAS-HA-ATXN3tr-27Q/UAS-Htt-152Q-eGFP*]. Outer and inner dashed lines indicate the borders of cell bodies and nuclei, respectively. White-colored arrows indicate cytosolic protein aggregates in the cell bodies of C4da neurons. Scale bar = 5  $\mu$ m.
